# Supplementary material
Source: Frontiers journal article supplement (https://www.frontiersin.org/articles/479504)
Supplement: Table_1.XLS [file Table_1.XLS]

## Sheet: Sheet1
Table S1: the related targets and gene symbols of the ingredients in RP
MolId	MolName	Target	Symbol
MOL000392	formononetin	Nitric oxide synthase, inducible	NOS2
MOL000392	formononetin	Prostaglandin G/H synthase 1	PTGS1
MOL000392	formononetin	Muscarinic acetylcholine receptor M1	CHRM1
MOL000392	formononetin	Estrogen receptor	ESR1
MOL000392	formononetin	Androgen receptor	AR
MOL000392	formononetin	Peroxisome proliferator activated receptor gamma	PPARG
MOL000392	formononetin	Prostaglandin G/H synthase 2	PTGS2
MOL000392	formononetin	Retinoic acid receptor RXR-alpha	RXRA
MOL000392	formononetin	Alpha-1A adrenergic receptor	ADRA1A
MOL000392	formononetin	Sodium-dependent dopamine transporter	SLC6A3
MOL000392	formononetin	Beta-2 adrenergic receptor	ADRB2
MOL000392	formononetin	Sodium-dependent serotonin transporter	SLC6A4
MOL000392	formononetin	Estrogen receptor beta	ESR2
MOL000392	formononetin	Mitogen-activated protein kinase 14	MAPK14
MOL000392	formononetin	Glycogen synthase kinase-3 beta	GSK3B
MOL000392	formononetin	Amine oxidase [flavin-containing] B	MAOB
MOL000392	formononetin	Serine/threonine-protein kinase Chk1	CHEK1
MOL000392	formononetin	Trypsin-1	PRSS1
MOL000392	formononetin	Cyclin-A2	CCNA2
MOL000392	formononetin	cAMP-dependent protein kinase inhibitor alpha	PKIA
MOL000392	formononetin	Acetylcholinesterase	ACHE
MOL000392	formononetin	Transcription factor AP-1	JUN
MOL000392	formononetin	Peroxisome proliferator-activated receptor gamma	PPARG
MOL000392	formononetin	Interleukin-4	IL4
MOL000392	formononetin	ATP synthase subunit beta, mitochondrial	ATP5F1B
MOL000392	formononetin	NADH-ubiquinone oxidoreductase chain 6	ND6
MOL000392	formononetin	3 beta-hydroxysteroid dehydrogenase/Delta 5-->4-isomerase type 2	HSD3B2
MOL000392	formononetin	3 beta-hydroxysteroid dehydrogenase/Delta 5-->4-isomerase type 1	HSD3B1
MOL000357	Sitogluside	Progesterone receptor	PGR
MOL000357	Sitogluside	Prostaglandin G/H synthase 1	PTGS1
MOL000357	Sitogluside	Muscarinic acetylcholine receptor M3	CHRM3
MOL000357	Sitogluside	Potassium voltage-gated channel subfamily H member 2	KCNH2
MOL000357	Sitogluside	Muscarinic acetylcholine receptor M1	CHRM1
MOL000357	Sitogluside	Sodium channel protein type 5 subunit alpha	SCN5A
MOL000357	Sitogluside	Prostaglandin G/H synthase 2	PTGS2
MOL000357	Sitogluside	5-hydroxytryptamine receptor 3A	HTR3A
MOL000357	Sitogluside	Retinoic acid receptor RXR-alpha	RXRA
MOL000357	Sitogluside	Alpha-1B adrenergic receptor	ADRA1B
MOL000357	Sitogluside	Beta-2 adrenergic receptor	ADRB2
MOL000357	Sitogluside	Alpha-1D adrenergic receptor	ADRA1D
MOL000357	Sitogluside	Nuclear receptor coactivator 2	NCOA2
MOL000358	beta-sitosterol	Progesterone receptor	PGR
MOL000358	beta-sitosterol	Nuclear receptor coactivator 2	NCOA2
MOL000358	beta-sitosterol	Prostaglandin G/H synthase 1	PTGS1
MOL000358	beta-sitosterol	Prostaglandin G/H synthase 2	PTGS2
MOL000358	beta-sitosterol	Potassium voltage-gated channel subfamily H member 2	KCNH2
MOL000358	beta-sitosterol	Muscarinic acetylcholine receptor M3	CHRM3
MOL000358	beta-sitosterol	Muscarinic acetylcholine receptor M1	CHRM1
MOL000358	beta-sitosterol	Sodium channel protein type 5 subunit alpha	SCN5A
MOL000358	beta-sitosterol	Muscarinic acetylcholine receptor M4	CHRM4
MOL000358	beta-sitosterol	Alpha-1A adrenergic receptor	ADRA1A
MOL000358	beta-sitosterol	Muscarinic acetylcholine receptor M2	CHRM2
MOL000358	beta-sitosterol	Alpha-1B adrenergic receptor	ADRA1B
MOL000358	beta-sitosterol	Beta-2 adrenergic receptor	ADRB2
MOL000358	beta-sitosterol	Neuronal acetylcholine receptor subunit alpha-2	CHRNA2
MOL000358	beta-sitosterol	Sodium-dependent serotonin transporter	SLC6A4
MOL000358	beta-sitosterol	Mu-type opioid receptor	OPRM1
MOL000358	beta-sitosterol	Gamma-aminobutyric acid receptor subunit alpha-1	GABRA1
MOL000358	beta-sitosterol	Apoptosis regulator Bcl-2	BCL2
MOL000358	beta-sitosterol	Apoptosis regulator BAX	BAX
MOL000358	beta-sitosterol	Caspase-9	CASP9
MOL000358	beta-sitosterol	Transcription factor AP-1	JUN
MOL000358	beta-sitosterol	Caspase-3	CASP3
MOL000358	beta-sitosterol	Caspase-8	CASP8
MOL000358	beta-sitosterol	Protein kinase C alpha type	PRKCA
MOL000358	beta-sitosterol	Serum paraoxonase/arylesterase 1	PON1
MOL000358	beta-sitosterol	Microtubule-associated protein 2	MAP2
MOL000390	daidzein	Prostaglandin G/H synthase 1	PTGS1
MOL000390	daidzein	Estrogen receptor	ESR1
MOL000390	daidzein	Peroxisome proliferator activated receptor gamma	PPARG
MOL000390	daidzein	Prostaglandin G/H synthase 2	PTGS2
MOL000390	daidzein	Retinoic acid receptor RXR-alpha	RXRA
MOL000390	daidzein	Beta-2 adrenergic receptor	ADRB2
MOL000390	daidzein	Mitogen-activated protein kinase 14	MAPK14
MOL000390	daidzein	Serine/threonine-protein kinase Chk1	CHEK1
MOL000390	daidzein	Trypsin-1	PRSS1
MOL000390	daidzein	Transcription factor p65	RELA
MOL000390	daidzein	Vascular endothelial growth factor A	VEGFA
MOL000390	daidzein	Proto-oncogene c-Fos	FOS
MOL000390	daidzein	Cyclin-dependent kinase inhibitor 1	CDKN1A
MOL000390	daidzein	Eukaryotic translation initiation factor 6	EIF6
MOL000390	daidzein	Apoptosis regulator BAX	BAX
MOL000390	daidzein	Tumor necrosis factor	TNFSF15
MOL000390	daidzein	Transcription factor AP-1	JUN
MOL000390	daidzein	Interleukin-6	IL6
MOL000390	daidzein	Nitric oxide synthase, inducible	NOS2
MOL000390	daidzein	Caspase-3	CASP3
MOL000390	daidzein	Cellular tumor antigen p53	TP63
MOL000390	daidzein	Low-density lipoprotein receptor	LDLR
MOL000390	daidzein	Catalase	CAT
MOL000390	daidzein	Insulin-like growth factor 1 receptor	IGF1R
MOL000390	daidzein	Signal transducer and activator of transcription 1-alpha/beta	STAT1
MOL000390	daidzein	Peroxisome proliferator-activated receptor gamma	PPARG
MOL000390	daidzein	Cytochrome P450 3A4	CYP3A4
MOL000390	daidzein	Caveolin-1	CAV1
MOL000390	daidzein	Intercellular adhesion molecule 1	ICAM1
MOL000390	daidzein	Microsomal triglyceride transfer protein large subunit	MTTP
MOL000390	daidzein	Apolipoprotein B-100	APOB
MOL000390	daidzein	Vascular cell adhesion protein 1	VCAM1
MOL000390	daidzein	Superoxide dismutase [Mn], mitochondrial	SOD2
MOL000390	daidzein	Nitric oxide synthase, endothelial	NOS3
MOL000390	daidzein	Endothelin-converting enzyme 1	ECE1
MOL000390	daidzein	Gamma-aminobutyric acid type B receptor subunit 1	GABBR1
MOL000390	daidzein	Interleukin-4	IL4
MOL000390	daidzein	Carnitine O-palmitoyltransferase 1, liver isoform	CPT1A
MOL000390	daidzein	Aryl hydrocarbon receptor	AHR
MOL000390	daidzein	Transforming protein RhoA	RHOA
MOL000390	daidzein	Metallothionein-2	MT2A
MOL000390	daidzein	Low affinity immunoglobulin epsilon Fc receptor	FCER2
MOL000390	daidzein	Histone acetyltransferase p300	EP300
MOL000390	daidzein	ATP synthase subunit beta, mitochondrial	ATP5F1B
MOL000390	daidzein	NADH-ubiquinone oxidoreductase chain 6	ND6
MOL000390	daidzein	3 beta-hydroxysteroid dehydrogenase/Delta 5-->4-isomerase type 2	HSD3B2
MOL000390	daidzein	3 beta-hydroxysteroid dehydrogenase/Delta 5-->4-isomerase type 1	HSD3B1
MOL000390	daidzein	Trefoil factor 1	TFF1
MOL000390	daidzein	Transient receptor potential cation channel subfamily M member 2	TRPM2
MOL000390	daidzein	Somatotropin	GH1
MOL000390	daidzein	Peroxisome proliferator-activated receptor gamma coactivator 1-beta	PPARGC1B
MOL000390	daidzein	Beta-1,4-galactosyltransferase 4	B4GALT4
MOL000390	daidzein	Growth hormone receptor	GHR
MOL000390	daidzein	Transforming growth factor beta-1-induced transcript 1 protein	TGFB1I1
MOL000390	daidzein	CD5 antigen-like	CD5L
MOL000390	daidzein	Protein disulfide-isomerase	P4HB
MOL000390	daidzein	Steroid 21-hydroxylase	CYP21A2
MOL000390	daidzein	Growth arrest and DNA damage-inducible protein GADD45 alpha	GADD45A
MOL000390	daidzein	BRCA1-associated RING domain protein 1	BARD1
MOL000390	daidzein	RNA-binding protein 45	RBM45
MOL000390	daidzein	Ubiquitin carboxyl-terminal hydrolase BAP1	BAP1
MOL000390	daidzein	DNA repair protein RAD51 homolog 1	RAD51
MOL000391	Ononin	Nitric oxide synthase, inducible	NOS2
MOL000391	Ononin	Estrogen receptor	ESR1
MOL000391	Ononin	Androgen receptor	AR
MOL000391	Ononin	Prostaglandin G/H synthase 2	PTGS2
MOL000391	Ononin	Coagulation factor VII	F7
MOL000391	Ononin	Vascular endothelial growth factor receptor 2	KDR
MOL000391	Ononin	Peroxisome proliferator activated receptor gamma	PPARG
MOL000481	genistein	Prostaglandin G/H synthase 1	PTGS1
MOL000481	genistein	Estrogen receptor	ESR1
MOL000481	genistein	Peroxisome proliferator activated receptor gamma	PPARG
MOL000481	genistein	Prostaglandin G/H synthase 2	PTGS2
MOL000481	genistein	Mitogen-activated protein kinase 14	MAPK14
MOL000481	genistein	Serine/threonine-protein kinase Chk1	CHEK1
MOL000481	genistein	Trypsin-1	PRSS1
MOL000481	genistein	Transcription factor p65	RELA
MOL000481	genistein	Epidermal growth factor receptor	EGFR
MOL000481	genistein	Signal transducer and activator of transcription 3	STAT3
MOL000481	genistein	RAC-alpha serine/threonine-protein kinase	AKT1
MOL000481	genistein	Vascular endothelial growth factor A	VEGFA
MOL000481	genistein	Apoptosis regulator Bcl-2	BCL2
MOL000481	genistein	Proto-oncogene c-Fos	FOS
MOL000481	genistein	Cyclin-dependent kinase inhibitor 1	CDKN1A
MOL000481	genistein	Apoptosis regulator BAX	BAX
MOL000481	genistein	Caspase-9	CASP9
MOL000481	genistein	Matrix metalloproteinase-9	MMP9
MOL000481	genistein	Mitogen-activated protein kinase 3	MAPK3
MOL000481	genistein	Mitogen-activated protein kinase 1	MAPK1
MOL000481	genistein	Tumor necrosis factor	TNFSF15
MOL000481	genistein	Transcription factor AP-1	JUN
MOL000481	genistein	Nitric oxide synthase, inducible	NOS2
MOL000481	genistein	Activator of 90 kDa heat shock protein ATPase homolog 1	AHSA1
MOL000481	genistein	Caspase-3	CASP3
MOL000481	genistein	Cellular tumor antigen p53	TP63
MOL000481	genistein	Low-density lipoprotein receptor	LDLR
MOL000481	genistein	E3 ubiquitin-protein ligase Mdm2	MDM2
MOL000481	genistein	Ras-specific guanine nucleotide-releasing factor 2	RASGRF2
MOL000481	genistein	RAF proto-oncogene serine/threonine-protein kinase	RAF1
MOL000481	genistein	Telomerase protein component 1	TEP1
MOL000481	genistein	Metalloproteinase inhibitor 1	TIMP1
MOL000481	genistein	Hypoxia-inducible factor 1-alpha	HIF1A
MOL000481	genistein	Insulin-like growth factor 1 receptor	IGF1R
MOL000481	genistein	Signal transducer and activator of transcription 1-alpha/beta	STAT1
MOL000481	genistein	Receptor tyrosine-protein kinase erbB-2	ERBB2
MOL000481	genistein	Androgen receptor	AR
MOL000481	genistein	Peroxisome proliferator-activated receptor gamma	PPARG
MOL000481	genistein	Intercellular adhesion molecule 1	ICAM1
MOL000481	genistein	Interleukin-1 beta	IL1B
MOL000481	genistein	C-C motif chemokine 2	CCL2
MOL000481	genistein	E-selectin	SELE
MOL000481	genistein	Vascular cell adhesion protein 1	VCAM1
MOL000481	genistein	Fibronectin	FN1
MOL000481	genistein	Interleukin-8	CXCL8
MOL000481	genistein	Superoxide dismutase [Mn], mitochondrial	SOD2
MOL000481	genistein	Baculoviral IAP repeat-containing protein 5	BIRC5
MOL000481	genistein	Nitric oxide synthase, endothelial	NOS3
MOL000481	genistein	Estrogen sulfotransferase	SULT1E1
MOL000481	genistein	G2/mitotic-specific cyclin-B1	CCNB1
MOL000481	genistein	M-phase inducer phosphatase 3	CDC25C
MOL000481	genistein	3-hydroxy-3-methylglutaryl-coenzyme A reductase	HMGCR
MOL000481	genistein	Tyrosine-protein kinase BTK	BTK
MOL000481	genistein	Serine/threonine-protein kinase PLK2	PLK2
MOL000481	genistein	Glial fibrillary acidic protein	GFAP
MOL000481	genistein	UDP-glucuronosyltransferase 1-1	UGT1A1
MOL000481	genistein	Serine/threonine-protein kinase Chk2	CHEK2
MOL000481	genistein	Peroxisome proliferator-activated receptor alpha	PPARA
MOL000481	genistein	Procollagen C-endopeptidase enhancer 1	PCOLCE
MOL000481	genistein	Serine-protein kinase ATM	ATM
MOL000481	genistein	Insulin	INS
MOL000481	genistein	Lymphokine-activated killer T-cell-originated protein kinase	PBK
MOL000481	genistein	Mitotic checkpoint serine/threonine-protein kinase BUB1	BUB1
MOL000481	genistein	Cell division cycle protein 20 homolog	CDC20
MOL000481	genistein	Aldose reductase	AKR1B1
MOL000481	genistein	Alpha-crystallin B chain	CRYAB
MOL000481	genistein	Prostate-specific antigen	KLK3
MOL000481	genistein	Hsp90 co-chaperone Cdc37	CDC37
MOL000481	genistein	Histone deacetylase 6	HDAC6
MOL000481	genistein	Dual specificity mitogen-activated protein kinase kinase 5	MAP2K5
MOL000481	genistein	Mitogen-activated protein kinase 12	MAPK12
MOL000481	genistein	Apolipoprotein A-I	APOA1
MOL000481	genistein	Serine/threonine-protein kinase PLK1	PLK1
MOL000481	genistein	E3 ubiquitin-protein ligase CCNB1IP1	CCNB1IP1
MOL000481	genistein	Mediator of DNA damage checkpoint protein 1	MDC1
MOL000481	genistein	Scaffold attachment factor B1	SAFB
MOL000481	genistein	Cystic fibrosis transmembrane conductance regulator	CFTR
MOL000481	genistein	Nuclear receptor corepressor 1	NCOR1
MOL000481	genistein	Glucokinase	GCKR
MOL000481	genistein	ATP-sensitive inward rectifier potassium channel 11	KCNJ11
MOL000481	genistein	1,25-dihydroxyvitamin D(3) 24-hydroxylase, mitochondrial	CYP24A1
MOL000481	genistein	Prostaglandin E2 receptor EP2 subtype	PTGER2
MOL000481	genistein	Prostaglandin F2-alpha receptor	PTGFR
MOL000481	genistein	Beta-galactosidase	GLB1
MOL000481	genistein	Mesothelin	MSLN
MOL000481	genistein	Tyrosine-protein kinase SYK	SYK
MOL000663	lignoceric acid	Dual oxidase 2	DUOX2
MOL000663	lignoceric acid	Neutrophil cytosol factor 1	NCF1
MOL001999	scoparone	Prostaglandin G/H synthase 1	PTGS1
MOL001999	scoparone	Muscarinic acetylcholine receptor M1	CHRM1
MOL001999	scoparone	Prostaglandin G/H synthase 2	PTGS2
MOL001999	scoparone	Beta-2 adrenergic receptor	ADRB2
MOL001999	scoparone	Sodium-dependent serotonin transporter	SLC6A4
MOL001999	scoparone	Gamma-aminobutyric acid receptor subunit alpha-1	GABRA1
MOL001999	scoparone	Leukotriene A-4 hydrolase	LTA4H
MOL001999	scoparone	Amine oxidase [flavin-containing] B	MAOB
MOL001999	scoparone	Glutamate receptor 2	GRIA2
MOL001999	scoparone	cAMP-dependent protein kinase inhibitor alpha	PKIA
MOL001999	scoparone	Transcription factor p65	RELA
MOL001999	scoparone	NF-kappa-B inhibitor alpha	NFKBIA
MOL001999	scoparone	C-C motif chemokine 2	CCL2
MOL001999	scoparone	Interleukin-8	CXCL8
MOL001999	scoparone	Tyrosinase	TYR
MOL001999	scoparone	5,6-dihydroxyindole-2-carboxylic acid oxidase	TYRP1
MOL001999	scoparone	L-dopachrome tautomerase	DCT
MOL002347	(R)-Allantoin	Prostaglandin G/H synthase 2	PTGS2
MOL002347	(R)-Allantoin	Glutamate receptor 2	GRIA2
MOL002959	3'-Methoxydaidzein	Nitric oxide synthase, inducible	NOS2
MOL002959	3'-Methoxydaidzein	Prostaglandin G/H synthase 1	PTGS1
MOL002959	3'-Methoxydaidzein	Estrogen receptor	ESR1
MOL002959	3'-Methoxydaidzein	Androgen receptor	AR
MOL002959	3'-Methoxydaidzein	Peroxisome proliferator activated receptor gamma	PPARG
MOL002959	3'-Methoxydaidzein	Prostaglandin G/H synthase 2	PTGS2
MOL002959	3'-Methoxydaidzein	Retinoic acid receptor RXR-alpha	RXRA
MOL002959	3'-Methoxydaidzein	Estrogen receptor beta	ESR2
MOL002959	3'-Methoxydaidzein	Mitogen-activated protein kinase 14	MAPK14
MOL002959	3'-Methoxydaidzein	Glycogen synthase kinase-3 beta	GSK3B
MOL002959	3'-Methoxydaidzein	Serine/threonine-protein kinase Chk1	CHEK1
MOL002959	3'-Methoxydaidzein	Trypsin-1	PRSS1
MOL002959	3'-Methoxydaidzein	Cyclin-A2	CCNA2
MOL002959	3'-Methoxydaidzein	Nuclear receptor coactivator 1	NCOA1
MOL012297	puerarin	Estrogen receptor	ESR1
MOL012297	puerarin	Androgen receptor	AR
MOL012297	puerarin	Prostaglandin G/H synthase 2	PTGS2
MOL012297	puerarin	Glycogen synthase kinase-3 beta	GSK3B
MOL012297	puerarin	Transcription factor p65	RELA
MOL012297	puerarin	Signal transducer and activator of transcription 3	STAT3
MOL012297	puerarin	RAC-alpha serine/threonine-protein kinase	AKT1
MOL012297	puerarin	Vascular endothelial growth factor A	VEGFA
MOL012297	puerarin	Apoptosis regulator Bcl-2	BCL2
MOL012297	puerarin	Proto-oncogene c-Fos	FOS
MOL012297	puerarin	Apoptosis regulator BAX	BAX
MOL012297	puerarin	Caspase-9	CASP9
MOL012297	puerarin	72 kDa type IV collagenase	MMP2
MOL012297	puerarin	Matrix metalloproteinase-9	MMP9
MOL012297	puerarin	Tumor necrosis factor	TNFSF15
MOL012297	puerarin	Transcription factor AP-1	JUN
MOL012297	puerarin	Nitric oxide synthase, inducible	NOS2
MOL012297	puerarin	Caspase-3	CASP3
MOL012297	puerarin	NF-kappa-B inhibitor alpha	NFKBIA
MOL012297	puerarin	Caspase-8	CASP8
MOL012297	puerarin	Superoxide dismutase [Cu-Zn]	SOD1
MOL012297	puerarin	Protein kinase C alpha type	PRKCA
MOL012297	puerarin	Metalloproteinase inhibitor 2	TIMP2
MOL012297	puerarin	Hypoxia-inducible factor 1-alpha	HIF1A
MOL012297	puerarin	Tumor necrosis factor receptor superfamily member 6	FAS
MOL012297	puerarin	Peroxisome proliferator-activated receptor gamma	PPARG
MOL012297	puerarin	Vascular cell adhesion protein 1	VCAM1
MOL012297	puerarin	Mitogen-activated protein kinase 9	MAPK9
MOL012297	puerarin	Baculoviral IAP repeat-containing protein 5	BIRC5
MOL012297	puerarin	Nitric oxide synthase, endothelial	NOS3
MOL012297	puerarin	Tissue-type plasminogen activator	PLAT
MOL012297	puerarin	Glutathione S-transferase P	GSTP1
MOL012297	puerarin	Serine/threonine-protein kinase Chk2	CHEK2
MOL012297	puerarin	P-selectin	SELP
MOL012297	puerarin	Type-1 angiotensin II receptor	AGTR1
MOL012297	puerarin	Aldose reductase	AKR1B1
MOL012297	puerarin	Interferon beta	IFNB1
MOL012297	puerarin	Platelet-derived growth factor subunit A	PDGFA
MOL012297	puerarin	Angiotensin-converting enzyme 2	ACE2
MOL012297	puerarin	Alanine aminotransferase 1	GPT
MOL012297	puerarin	Tyrosine-protein kinase JAK3	JAK3
MOL012297	puerarin	Cyclin-dependent kinase inhibitor 1B	CDKN1B
MOL012297	puerarin	CDKN2A-interacting protein	CDKN2AIP
MOL012297	puerarin	Interferon alpha-1/13	IFNA13
MOL012297	puerarin	Integrin beta-5	ITGB5
MOL012297	puerarin	Leptin receptor	LEPR
MOL012297	puerarin	Perilipin-2	PLIN2
MOL012297	puerarin	Proteinase-activated receptor 1	F2R
MOL004631	7,8,4'-Trihydroxyisoflavone	Prostaglandin G/H synthase 1	PTGS1
MOL004631	7,8,4'-Trihydroxyisoflavone	Estrogen receptor	ESR1
MOL004631	7,8,4'-Trihydroxyisoflavone	Androgen receptor	AR
MOL004631	7,8,4'-Trihydroxyisoflavone	Peroxisome proliferator activated receptor gamma	PPARG
MOL004631	7,8,4'-Trihydroxyisoflavone	Prostaglandin G/H synthase 2	PTGS2
MOL004631	7,8,4'-Trihydroxyisoflavone	Estrogen receptor beta	ESR2
MOL004631	7,8,4'-Trihydroxyisoflavone	Mitogen-activated protein kinase 14	MAPK14
MOL004631	7,8,4'-Trihydroxyisoflavone	Serine/threonine-protein kinase Chk1	CHEK1
MOL004631	7,8,4'-Trihydroxyisoflavone	Trypsin-1	PRSS1
MOL004631	7,8,4'-Trihydroxyisoflavone	Cyclin-A2	CCNA2
MOL004631	7,8,4'-Trihydroxyisoflavone	Nuclear receptor coactivator 2	NCOA2
MOL009720	daidzin	Androgen receptor	AR
MOL009720	daidzin	Prostaglandin G/H synthase 2	PTGS2
MOL009720	daidzin	Estrogen receptor	ESR1
MOL009720	daidzin	Peroxisome proliferator activated receptor gamma	PPARG
MOL009720	daidzin	Coagulation factor VII	F7
MOL009720	daidzin	Vascular endothelial growth factor receptor 2	KDR
MOL009720	daidzin	Glycogen synthase kinase-3 beta	GSK3B
MOL009720	daidzin	Acetylcholinesterase	ACHE
MOL009720	daidzin	Amine oxidase [flavin-containing] A	MAOA
MOL009720	daidzin	Aldehyde dehydrogenase, mitochondrial	ALDH2
